# Supplementary material for: The Antiapoptotic Function of miR-96 in Prostate Cancer by Inhibition of FOXO1
Source: PLoS One. 2013 Nov 19;8(11):e80807. doi: 10.1371/journal.pone.0080807 (PMC3834337; doi:10.1371/journal.pone.0080807)
Supplement: Table S2 — Predicted miR-96 targets and their GO terms. (XLS) [file pone.0080807.s009.xls]

## Sheet: miR-96 targets
Supplementary table S2. Predicted miR-96 targets and their GO terms.
Predicted genes with a known function in apoptosis are highlighted in red.
Accesion Number	Gene Symbol	Count	GO terms
NM_015270	ADCY6	9	ATP binding|adenylate cyclase activity|metal ion binding|nucleotide binding|protein binding|receptor binding|activation of adenylate cyclase activity by G-protein signaling pathway|activation of protein kinase A activity|cAMP biosynthetic process|hormone-mediated signaling pathway|inhibition of adenylate cyclase activity by G-protein signaling pathway|integral to membrane|intracellular part|membr…
NM_003654	CHST1	6	keratan sulfotransferase activity|sulfotransferase activity|transferase activity|galactose metabolic process|inflammatory response|keratan sulfate metabolic process|polysaccharide metabolic process|sulfur metabolic process|Golgi apparatus|Golgi membrane|integral to membrane|membrane
NM_004481	GALNT2	6	manganese ion binding|polypeptide N-acetylgalactosaminyltransferase activity|sugar binding|transferase activity, transferring glycosyl groups|immunoglobulin biosynthetic process|protein amino acid O-linked glycosylation via serine|protein amino acid O-linked glycosylation via threonine|Golgi apparatus|Golgi apparatus|Golgi cisterna membrane|Golgi stack|extracellular region|integral to Golgi membr…
NM_004514	FOXK2	6	RNA polymerase II transcription factor activity|magnesium ion binding|sequence-specific DNA binding|transcription factor activity|regulation of transcription from RNA polymerase II promoter|regulation of transcription, DNA-dependent|nucleus
NM_004731	SLC16A7	6	pyruvate secondary active transmembrane transporter activity|secondary active monocarboxylate transmembrane transporter activity|symporter activity|pyruvate metabolic process|pyruvate transport|transmembrane transport|integral to plasma membrane|membrane fraction|plasma membrane
NM_004926	ZFP36L1	6	AU-rich element binding|mRNA binding|metal ion binding|protein binding|transcription factor activity|zinc ion binding|mRNA catabolic process|nuclear-transcribed mRNA catabolic process, deadenylation-dependent decay|regulation of mRNA stability|regulation of translation|vasculogenesis|cytoplasm|cytosol|nucleus
NM_004958	FRAP1	6	ATP binding|drug binding|kinase activity|kinase activity|nucleotide binding|phosphoprotein binding|phosphotransferase activity, alcohol group as acceptor|protein binding|protein binding|protein serine/threonine kinase activity|protein serine/threonine kinase activity|TOR signaling pathway|cell growth|germ cell development|growth|negative regulation of cell size|negative regulation of macroautopha…
NM_004985	KRAS	6	GDP binding|GMP binding|GTP binding|GTPase activity|LRR domain binding|nucleotide binding|protein binding|Ras protein signal transduction|actin cytoskeleton organization|cell aging|cytokine-mediated signaling pathway|endocytosis|intracellular signaling cascade|negative regulation of neuron apoptosis|positive regulation of MAP kinase activity|positive regulation of NF-kappaB transcription factor a…
NM_005277	GPM6A	6	calcium channel activity|cell surface|integral to membrane|membrane
NM_005400	PRKCE	6	ATP binding|calcium-independent protein kinase C activity|enzyme binding|metal ion binding|nucleotide binding|protein binding|protein kinase C activity|signal transducer activity|transferase activity|induction of apoptosis|intracellular signaling cascade|protein amino acid phosphorylation|regulation of peptidyl-tyrosine phosphorylation|signal transduction|cytoplasm|nucleus|plasma membrane
NM_005502	ABCA1	6	ATP binding|ATPase activity|anion transmembrane transporter activity|apolipoprotein A-I binding|apolipoprotein A-I receptor activity|apolipoprotein binding|cholesterol binding|cholesterol transporter activity|nucleotide binding|phospholipid binding|phospholipid transporter activity|protein binding|small GTPase binding|syntaxin-13 binding|Cdc42 protein signal transduction|G-protein coupled recepto…
NM_005544	IRS1	6	SH2 domain binding|insulin receptor binding|insulin-like growth factor receptor activity|insulin-like growth factor receptor binding|phosphoinositide 3-kinase binding|phosphoinositide 3-kinase binding|protein binding|protein kinase C binding|signal transducer activity|transmembrane receptor protein tyrosine kinase docking protein activity|cellular response to insulin stimulus|glucose homeostasis|…
NM_005766	FARP1	6	Rho guanyl-nucleotide exchange factor activity|binding|cytoskeletal protein binding|guanyl-nucleotide exchange factor activity|regulation of Rho protein signal transduction|cytoplasm|cytoskeleton|extrinsic to membrane|intracellular
NM_006007	ZFAND5	6	DNA binding|metal ion binding|molecular_function|zinc ion binding|biological_process|face development|fibroblast migration|in utero embryonic development|platelet-derived growth factor receptor signaling pathway|respiratory system process|skeletal system morphogenesis|smooth muscle tissue development|vasculature development|cellular_component
NM_006016	CD164	6	protein binding|cell adhesion|hemopoiesis|heterophilic cell-cell adhesion|immune response|multicellular organismal development|muscle organ development|negative regulation of cell adhesion|negative regulation of cell proliferation|signal transduction|endosome|endosome membrane|extracellular region|integral to plasma membrane|lysosomal membrane|lysosome|plasma membrane
NM_006283	TACC1	6	protein binding|cell cycle|cell division|cytoplasm|cytoskeleton|microtubule organizing center|nucleus
NM_006373	VAT1	6	binding|oxidoreductase activity|zinc ion binding|oxidation reduction|integral to membrane
NM_006791	MORF4L1	6	chromatin binding|protein N-terminus binding|protein binding|DNA repair|cell proliferation|chromatin modification|histone H2A acetylation|histone H4 acetylation|histone deacetylation|regulation of growth|regulation of transcription|NuA4 histone acetyltransferase complex|Sin3 complex|nucleus
NM_006861	RAB35	6	GTP binding|GTPase activity|nucleotide binding|phosphatidylinositol-4,5-bisphosphate binding|cytokinesis|endosome transport|protein localization|protein transport|small GTPase mediated signal transduction|cell projection membrane|clathrin-coated endocytic vesicle|coated pit|intercellular bridge|melanosome|plasma membrane
NM_006940	SOX5	6	protein heterodimerization activity|transcription factor activity|cartilage development|cell fate commitment|central nervous system neuron differentiation|positive regulation of transcription from RNA polymerase II promoter|regulation of timing of neuron differentiation|regulation of transcription|transcription from RNA polymerase II promoter|nucleus
NM_007198	PROSC	6	molecular_function|biological_process|cytoplasm|intracellular
NM_012257	HBP1	6	DNA binding|protein binding|transcription regulator activity|Wnt receptor signaling pathway|cell cycle arrest|regulation of transcription|nucleus
NM_012300	FBXW11	6	protein binding|ubiquitin-protein ligase activity|Wnt receptor signaling pathway|protein ubiquitination|cytoplasm|ubiquitin ligase complex
NM_014839	LPPR4	6	hydrolase activity|lipid phosphatase activity|phosphatidate phosphatase activity|axonogenesis|phospholipid dephosphorylation|external side of plasma membrane|integral to plasma membrane|membrane
NM_014943	ZHX2	6	metal ion binding|protein binding|sequence-specific DNA binding|transcription factor activity|zinc ion binding|mRNA catabolic process|negative regulation of transcription from RNA polymerase II promoter|negative regulation of transcription, DNA-dependent|intracellular|nucleus
NM_014946	SPAST	6	ATP binding|alpha-tubulin binding|beta-tubulin binding|hydrolase activity|microtubule binding|microtubule binding|microtubule-severing ATPase activity|nucleoside-triphosphatase activity|nucleotide binding|protein binding|ER to Golgi vesicle-mediated transport|cell cycle|cell death|cell differentiation|cell division|cytokinesis, completion of separation|microtubule bundle formation|microtubule sev…
NM_015215	CAMTA1	6	calmodulin binding|transcription regulator activity|regulation of transcription|cytoplasm|nucleus
NM_015460	MYRIP	6	Rab GTPase binding|actin binding|metal ion binding|myosin binding|protein binding|zinc ion binding|intracellular protein transport|actin cytoskeleton|cytoplasm|melanosome|photoreceptor outer segment|synapse
NM_015516	TSKU	6	protein binding|extracellular region
NM_016565	CHCHD8	6
NM_016623	FAM49B	6
NM_000332	ATXN1	6	RNA binding|identical protein binding|poly(G) RNA binding|poly(U) RNA binding|protein C-terminus binding|protein binding|protein self-association|transcription repressor activity|RNA processing|cell death|negative regulation of transcription|nuclear export|cytoplasm|intracellular membrane-bounded organelle|nuclear RNA export factor complex|nuclear inclusion body|nuclear matrix|nucleolus|nucleopla…
NM_000663	ABAT	6	(S)-3-amino-2-methylpropionate transaminase activity|4-aminobutyrate transaminase activity|protein binding|protein homodimerization activity|pyridoxal phosphate binding|succinate-semialdehyde dehydrogenase binding|transferase activity|behavior|behavioral response to cocaine|copulation|gamma-aminobutyric acid catabolic process|locomotory behavior|negative regulation of blood pressure|neurotransmit…
NM_000935	PLOD2	6	L-ascorbic acid binding|iron ion binding|metal ion binding|oxidoreductase activity, acting on paired donors, with incorporation or reduction of molecular oxygen|oxidoreductase activity, acting on single donors with incorporation of molecular oxygen, incorporation of two atoms of oxygen|procollagen-lysine 5-dioxygenase activity|protein binding|oxidation reduction|protein modification process|respo…
NM_000945	PPP3R1	6	calcium ion binding|calcium-dependent protein serine/threonine phosphatase activity|calmodulin binding|protein binding|activation of pro-apoptotic gene products|calcineurin complex|cytosol
NM_001839	CNN3	6	actin binding|calmodulin binding|microtubule binding|tropomyosin binding|troponin C binding|actomyosin structure organization|smooth muscle contraction|cellular_component|dendritic spine|neuronal cell body|postsynaptic density
NM_001931	DLAT	6	acyltransferase activity|dihydrolipoyllysine-residue acetyltransferase activity|lipoic acid binding|protein binding|transferase activity|acetyl-CoA biosynthetic process|acetyl-CoA biosynthetic process from pyruvate|glycolysis|metabolic process|pyruvate metabolic process|mitochondrial pyruvate dehydrogenase complex|mitochondrion
NM_001945	HBEGF	6	epidermal growth factor receptor binding|growth factor activity|heparin binding|receptor activity|epidermal growth factor receptor signaling pathway|muscle organ development|negative regulation of elastin biosynthetic process|positive regulation of cell growth|positive regulation of keratinocyte migration|positive regulation of smooth muscle cell proliferation|regulation of heart contraction|sign…
NM_002015	FOXO1	6	protein binding|sequence-specific DNA binding|transcription activator activity|transcription factor activity|anti-apoptosis|blood vessel development|insulin receptor signaling pathway|negative regulation of stress-activated MAPK cascade|positive regulation of transcription|positive regulation of transcription from RNA polymerase II promoter|regulation of cell proliferation|regulation of transcrip…
NM_002222	ITPR1	6	calcium channel activity|calcium ion transmembrane transporter activity|inositol 1,4,5-trisphosphate-sensitive calcium-release channel activity|inositol-1,4,5-trisphosphate receptor activity|ion channel activity|phosphoinositide binding|protein binding|calcium ion transport|cell death|endoplasmic reticulum calcium ion homeostasis|ion transport|post-embryonic development|response to hypoxia|signal…
NM_002223	ITPR2	6	calcium ion transmembrane transporter activity|inositol 1,4,5-trisphosphate-sensitive calcium-release channel activity|inositol-1,4,5-trisphosphate receptor activity|ion channel activity|phosphoinositide binding|calcium ion transport|ion transport|response to hypoxia|signal transduction|transmembrane transport|transport|axon|cell cortex|cytoplasm|integral to membrane|membrane|microsome|myelin she…
NM_002265	KPNB1	6	nuclear localization sequence binding|protein binding|protein binding|protein domain specific binding|protein transporter activity|zinc ion binding|NLS-bearing substrate import into nucleus|interspecies interaction between organisms|protein import into nucleus|protein import into nucleus, translocation|ribosomal protein import into nucleus|cytoplasm|cytosol|nuclear pore|nucleoplasm|nucleus
NM_002515	NOVA1	6	RNA binding|mRNA binding|protein binding|RNA processing|RNA splicing|locomotory behavior|nuclear mRNA splicing, via spliceosome|synaptic transmission|nucleolus|nucleus
NM_002734	PRKAR1A	6	cAMP binding|cAMP-dependent protein kinase regulator activity|nucleotide binding|protein binding|activation of protein kinase A activity|hormone-mediated signaling pathway|intracellular signaling cascade|mesoderm formation|regulation of protein amino acid phosphorylation|regulation of transcription from RNA polymerase II promoter|cAMP-dependent protein kinase complex|cytosol|neuromuscular junctio…
NM_002833	PTPN9	6	hydrolase activity|non-membrane spanning protein tyrosine phosphatase activity|protein binding|protein tyrosine phosphatase activity|protein amino acid dephosphorylation|cytoplasm
NM_002923	RGS2	6	GTPase activator activity|calmodulin binding|protein binding|signal transducer activity|brown fat cell differentiation|cell cycle|negative regulation of signal transduction|regulation of G-protein coupled receptor protein signaling pathway|spermatogenesis
NM_002959	SORT1	6	enzyme binding|nerve growth factor binding|nerve growth factor receptor activity|neurotensin receptor activity, non-G-protein coupled|protein binding|receptor activity|G-protein coupled receptor protein signaling pathway|Golgi to endosome transport|cell differentiation|endocytosis|endosome to lysosome transport|endosome transport via multivesicular body sorting pathway|glucose import|induction of…
NM_002998	SDC2	6	cytoskeletal protein binding|molecular_function|protein binding|biological_process|integral to plasma membrane|membrane
NM_003060	SLC22A5	6	ATP binding|PDZ domain binding|carnitine transporter activity|carnitine transporter activity|drug transmembrane transporter activity|ion transmembrane transporter activity|nucleotide binding|protein binding|quaternary ammonium group transmembrane transporter activity|symporter activity|transporter activity|carnitine transport|carnitine transport|drug transport|ion transport|positive regulation of…
NM_003182	TAC1	6	substance P receptor binding|associative learning|cell-cell signaling|detection of abiotic stimulus|elevation of cytosolic calcium ion concentration|inflammatory response|insemination|long-term memory|negative regulation of heart rate|neuropeptide signaling pathway|positive regulation of action potential|positive regulation of acute inflammatory response|positive regulation of epithelial cell mig…
NM_003342	UBE2G1	6	ATP binding|ligase activity|nucleotide binding|ubiquitin-protein ligase activity|post-translational protein modification|regulation of protein metabolic process|ubiquitin-dependent protein catabolic process
NM_003379	EZR	6	actin filament binding|cell adhesion molecule binding|cytoskeletal protein binding|protein binding|actin filament bundle assembly|cytoskeletal anchoring at plasma membrane|epithelial cell differentiation|establishment or maintenance of apical/basal cell polarity|leukocyte cell-cell adhesion|membrane to membrane docking|regulation of cell shape|actin cytoskeleton|actin filament|apical part of cell…
NM_194071	CREB3L2	6	protein dimerization activity|sequence-specific DNA binding|transcription factor activity|regulation of transcription, DNA-dependent|response to unfolded protein|endoplasmic reticulum|endoplasmic reticulum membrane|integral to membrane|membrane|nucleus
NM_198459	DENND2C	6
NM_198715	PTGER3	6	G-protein coupled receptor activity|ligand-dependent nuclear receptor activity|prostaglandin E receptor activity|G-protein coupled receptor protein signaling pathway|cell death|signal transduction|transcription, DNA-dependent|integral to membrane|integral to plasma membrane|nuclear envelope|plasma membrane
NM_017974	ATG16L1	6	protein binding|autophagic vacuole assembly|autophagy|protein homooligomerization|protein transport|autophagic vacuole|cytoplasm|pre-autophagosomal structure membrane
NM_018018	SLC38A4	6	amino acid transmembrane transporter activity|symporter activity|amino acid transport|ion transport|sodium ion transport|integral to membrane|plasma membrane
NM_018243	SEPT11	6	GTP binding|nucleotide binding|protein binding|cell cycle|cell division|protein heterooligomerization|axon|cell junction|cell projection|cytoplasm|cytoskeleton|dendritic spine|septin complex|stress fiber|synapse
NM_020182	PMEPA1	6	WW domain binding|protein binding|androgen receptor signaling pathway|integral to membrane|plasma membrane
NM_020423	SCYL3	6	ATP binding|kinase activity|protein binding|protein kinase activity|cell migration|protein amino acid phosphorylation|Golgi apparatus|cytoplasm|lamellipodium
NM_020795	NLGN2	6	neurexin binding|cell-cell adhesion|cell-cell junction maintenance|regulation of respiratory gaseous exchange by neurological system process|regulation of synaptic transmission|synapse assembly|integral to membrane|membrane|postsynaptic membrane|synapse
NM_020871	LRCH2	6	protein binding
NM_021229	NTN4	6	protein binding|neuron remodeling|basement membrane|extracellular region
NM_022041	GAN	6	molecular_function|protein binding|biological_process|cell death|cytoplasm|cytoskeleton|neurofilament
NM_024811	FLJ12529	6	RNA binding|nucleotide binding|protein binding|RNA splicing|mRNA processing|nucleus
NM_024915	GRHL2	6	DNA binding|regulation of transcription|cytoplasm|nucleus
NM_032139	ANKRD27	6	GTPase activator activity|guanyl-nucleotide exchange factor activity|protein binding|early endosome to late endosome transport|cytoplasm|early endosome|lysosome
NM_032373	PCGF5	6	metal ion binding|protein binding|zinc ion binding|regulation of transcription|centrosome
NM_032560	SMEK1	6	protein binding|cytoplasm|cytoskeleton|microtubule organizing center|nucleus
NM_033260	FOXQ1	6	sequence-specific DNA binding|transcription factor activity|hair follicle morphogenesis|regulation of transcription, DNA-dependent|nucleus
NM_033505	SELI	6	ethanolaminephosphotransferase activity|metal ion binding|phosphotransferase activity, for other substituted phosphate groups|transferase activity|phospholipid biosynthetic process|integral to membrane|membrane
NM_018121	C10orf6	5
NM_018970	GPR85	5	G-protein coupled receptor activity|receptor activity|G-protein coupled receptor protein signaling pathway|signal transduction|integral to membrane|plasma membrane
NM_019084	CCNJ	5	nucleus
NM_019114	EPB41L4B	5	binding|cytoskeletal protein binding|structural constituent of cytoskeleton|cytoplasm|cytoskeleton|extrinsic to membrane
NM_020177	FEM1C	5	cytoplasm
NM_020708	SLC12A5	5	ammonia transmembrane transporter activity|potassium:chloride symporter activity|protein binding|symporter activity|transporter activity|ammonium transport|cellular ion homeostasis|chloride transport|intracellular pH reduction|ion transport|potassium ion transport|sodium ion transport|synaptic transmission|transmembrane transport|transport|dendrite membrane|integral to membrane|perikaryon|plasma …
NM_020796	SEMA6A	5	protein binding|receptor activity|apoptosis|axon guidance|cell differentiation|cell surface receptor linked signaling pathway|cytoskeleton organization|multicellular organismal development|nervous system development|organ morphogenesis|axon|integral to membrane|membrane
NM_020927	KIAA1576	5	binding|oxidoreductase activity|zinc ion binding|oxidation reduction
NM_021090	MTMR3	5	hydrolase activity|metal ion binding|protein serine/threonine phosphatase activity|protein tyrosine phosphatase activity|zinc ion binding|protein amino acid dephosphorylation|cytoplasm|membrane|membrane fraction
NM_021111	RECK	5	endopeptidase inhibitor activity|metalloendopeptidase inhibitor activity|protein binding|serine-type endopeptidase inhibitor activity|blood vessel maturation|extracellular matrix organization|anchored to membrane|membrane fraction|peripheral to membrane of membrane fraction|plasma membrane
NM_021165	FAM5B	5	negative regulation of cell cycle|nervous system development|cytoplasm|extracellular region
NM_021198	CTDSP1	5	CTD phosphatase activity|hydrolase activity|metal ion binding|phosphoprotein phosphatase activity|protein binding|protein amino acid dephosphorylation|regulation of transcription from RNA polymerase II promoter|nucleus|nucleus
NM_022748	TNS3	5	protein binding|cell migration|lung alveolus development|positive regulation of cell proliferation|cell junction|cytoplasm|focal adhesion|nucleolus|nucleus|plasma membrane
NM_024052	C17orf39	5
NM_025058	TRIM46	5	metal ion binding|protein binding|zinc ion binding|intracellular
NM_025146	NAT13	5	N-acetyltransferase activity|acyltransferase activity|protein binding|transferase activity|N-terminal protein amino acid acetylation|metabolic process|cytoplasm
NM_025187	C16orf70	5	protein binding|receptor binding|Golgi to plasma membrane protein transport|dendrite|membrane fraction|synaptic vesicle membrane|trans-Golgi network
NM_025250	TTYH3	5	chloride channel activity|ion channel activity|ion transport|chloride channel complex|integral to membrane|plasma membrane
NM_030627	CPEB4	5	RNA binding|nucleotide binding
NM_030774	OR51E2	5	olfactory receptor activity|receptor activity|G-protein coupled receptor protein signaling pathway|response to stimulus|sensory perception of smell|signal transduction|integral to membrane|plasma membrane
NM_030927	TSPAN14	5	integral to membrane|membrane
NM_031934	RAB34	5	GTP binding|GTPase activity|guanyl nucleotide binding|nucleotide binding|endocytosis|protein transport|small GTPase mediated signal transduction|Golgi apparatus|cytoplasm|early endosome|ruffle
NM_032440	LCOR	5	RNA polymerase II transcription factor activity|transcription factor activity|transcription factor binding|negative regulation of transcription from RNA polymerase II promoter|regulation of transcription|nucleus
NM_032458	PHF6	5	metal ion binding|protein binding|zinc ion binding|regulation of transcription|nucleolus|nucleus
NM_032727	INA	5	structural constituent of cytoskeleton|cell differentiation|multicellular organismal development|nervous system development|neurofilament cytoskeleton organization|tissue regeneration|neurofilament
NM_033285	TP53INP1	5	apoptosis|cell cycle arrest|induction of apoptosis|response to stress|nucleus
NM_033631	LUZP1	5	nucleus
NM_048368	CTDP1	5	CTD phosphatase activity|DNA-directed RNA polymerase activity|hydrolase activity|phosphoprotein phosphatase activity|protein binding|protein amino acid dephosphorylation|intracellular|nucleoplasm|nucleus
NM_052840	BRUNOL6	5	RNA binding|nucleotide binding|mRNA processing|regulation of alternative nuclear mRNA splicing, via spliceosome|cytoplasm|nucleus
NM_052876	BTBD14B	5	protein binding|specific transcriptional repressor activity|induction of apoptosis|negative regulation of transcription|positive regulation of cell proliferation|protein homooligomerization|cytoplasm|intracellular membrane-bounded organelle|nuclear body|nucleolus|nucleus
NM_080617	CBLN4	5	cell junction|extracellular region|synapse
NM_080647	TBX1	5	RNA polymerase II transcription factor activity|protein homodimerization activity|sequence-specific DNA binding|transcription factor activity|embryonic viscerocranium morphogenesis|heart development|parathyroid gland development|pharyngeal system development|regulation of transcription from RNA polymerase II promoter|soft palate development|thymus development|nucleus
NM_080764	ZNF280B	5	DNA binding|metal ion binding|zinc ion binding|regulation of transcription|intracellular|nucleus
NM_080836	STK35	5	ATP binding|nucleotide binding|protein serine/threonine kinase activity|transferase activity|protein amino acid phosphorylation|cytoplasm|nucleus
NM_080872	UNC5D	5	protein binding|receptor activity|apoptosis|multicellular organismal development|signal transduction|integral to membrane|membrane
NM_134268	CYGB	5	heme binding|metal ion binding|oxygen binding|oxygen transporter activity|peroxidase activity|oxygen transport|response to oxidative stress|transport|cytoplasm|neuron projection|neuronal cell body
NM_138390	TMEM169	5	integral to membrane|membrane
NM_138992	BACE2	5	aspartic-type endopeptidase activity|peptidase activity|membrane protein ectodomain proteolysis|negative regulation of amyloid precursor protein biosynthetic process|peptide hormone processing|proteolysis|Golgi apparatus|cell surface|endoplasmic reticulum|endosome|integral to membrane|membrane
NM_144570	HN1L	5	cytoplasm|nucleus
NM_144704	AIFM3	5	2 iron, 2 sulfur cluster binding|FAD binding|caspase activator activity|metal ion binding|oxidoreductase activity|activation of caspase activity by cytochrome c|apoptosis|cell redox homeostasis|electron transport chain|induction of apoptosis|mitochondrial depolarization|transport|cytoplasm|cytosol|endoplasmic reticulum|mitochondrial inner membrane|mitochondrion|nucleus|plasma membrane
NM_145051	RNF183	5	metal ion binding|protein binding|zinc ion binding|integral to membrane|membrane
NM_145735	ARHGEF7	5	Rho guanyl-nucleotide exchange factor activity|guanyl-nucleotide exchange factor activity|protein binding|apoptosis|astrocyte cell migration|induction of apoptosis by extracellular signals|positive regulation of apoptosis|regulation of Rho protein signal transduction|signal transduction|small GTPase mediated signal transduction|cytoplasm|cytosol|focal adhesion|growth cone|intracellular
NM_152450	FAM81A	5
NM_000248	MITF	5	RNA polymerase II transcription factor activity, enhancer binding|chromatin binding|transcription activator activity|transcription activator activity|Wnt receptor signaling pathway|bone remodeling|camera-type eye development|cell fate commitment|melanocyte differentiation|multicellular organismal development|negative regulation of apoptosis|pigmentation|positive regulation of transcription from R…
NM_000252	MTM1	5	hydrolase activity|protein serine/threonine phosphatase activity|protein tyrosine phosphatase activity|muscle homeostasis|muscle organ development|protein amino acid dephosphorylation|cellular_component
NM_000555	DCX	5	microtubule binding|protein binding|axon extension|brain development|cell differentiation|central nervous system development|central nervous system projection neuron axonogenesis|dendrite morphogenesis|intracellular signaling cascade|multicellular organismal development|nervous system development|neuron migration|cytoplasm|cytoskeleton|intracellular|microtubule associated complex
NM_000683	ADRA2C	5	G-protein coupled receptor activity|adrenoceptor activity|alpha2-adrenergic receptor activity|protein binding|receptor activity|G-protein coupled receptor protein signaling pathway|activation of MAPK activity|cell-cell signaling|signal transduction|axon|endosome|integral to plasma membrane|plasma membrane
NM_000719	CACNA1C	5	calmodulin binding|dihydropyridine-sensitive calcium channel activity|protein binding|protein phosphatase 2A binding|voltage-gated calcium channel activity|voltage-gated ion channel activity|adult walking behavior|calcium ion transport|calcium ion transport into cytosol|calcium ion-dependent exocytosis|cellular calcium ion homeostasis|elevation of cytosolic calcium ion concentration|glucose homeo…
NM_000721	CACNA1E	5	voltage-gated calcium channel activity|voltage-gated ion channel activity|calcium ion transport|glucose homeostasis|ion transport|synaptic transmission|transmembrane transport|transport|integral to membrane|perikaryon|plasma membrane|voltage-gated calcium channel complex
NM_000722	CACNA2D1	5	dihydropyridine-sensitive calcium channel activity|metal ion binding|protein binding|voltage-gated calcium channel activity|voltage-gated ion channel activity|calcium ion transport|ion transport|regulation of calcium ion transport|T-tubule|integral to membrane|membrane|sarcoplasmic reticulum|voltage-gated calcium channel complex
NM_000757	CSF1	5	cytokine activity|growth factor activity|growth factor activity|macrophage colony stimulating factor receptor binding|macrophage colony stimulating factor receptor binding|protein binding|protein homodimerization activity|cell differentiation|cell proliferation|hemopoiesis|homeostasis of number of cells within a tissue|macrophage differentiation|monocyte activation|odontogenesis|positive regulati…
NM_000838	GRM1	5	G-protein coupled receptor activity|glutamate receptor activity|protein binding|receptor activity|G-protein coupled receptor protein signaling pathway|activation of MAPK activity|activation of MAPKK activity|calcium-mediated signaling|locomotory behavior|regulation of MAPKKK cascade|regulation of sensory perception of pain|regulation of synaptic transmission, glutamatergic|signal transduction|syn…
NM_000868	HTR2C	5	G-protein coupled receptor activity|protein binding|receptor activity|serotonin binding|serotonin receptor activity|G-protein coupled receptor protein signaling pathway|feeding behavior|signal transduction|synaptic transmission|cytoplasm|integral to membrane|nucleus|plasma membrane
NM_001003674	C18orf1	5	molecular_function|biological_process|integral to membrane|plasma membrane
NM_001005463	EBF3	5	DNA binding|metal ion binding|protein binding|transcription regulator activity|multicellular organismal development|positive regulation of transcription|regulation of transcription, DNA-dependent|nucleus
NM_001157	ANXA11	5	S100 alpha binding|calcium ion binding|calcium-dependent phospholipid binding|calcium-dependent protein binding|protein binding|cell cycle|cell division|cytokinesis, completion of separation|phagocytosis|response to calcium ion|azurophil granule|cytoplasm|cytoskeleton|melanosome|midbody|nuclear envelope|nuclear envelope|nucleoplasm|nucleoplasm|nucleus|phagocytic vesicle|specific granule|spindle
NM_001753	CAV1	5	cholesterol binding|identical protein binding|kinase binding|nitric-oxide synthase binding|peptidase activator activity|protein binding|protein complex scaffold|structural molecule activity|syntaxin binding|T cell costimulation|calcium ion homeostasis|calcium ion transport|caveola assembly|cellular calcium ion homeostasis|cholesterol efflux|cholesterol homeostasis|cholesterol homeostasis|choleste…
NM_001759	CCND2	5	protein binding|protein kinase binding|cell division|cellular response to insulin stimulus|liver development|ovarian follicle development|positive regulation of cyclin-dependent protein kinase activity|positive regulation of epithelial cell proliferation|positive regulation of protein amino acid phosphorylation|regulation of cell cycle|regulation of neuron differentiation|response to cAMP|respons…
NM_001969	EIF5	5	GTP binding|GTPase activity|nucleotide binding|translation factor activity, nucleic acid binding|translation initiation factor activity|regulation of translational initiation|translational initiation|cytoplasm|cytosol
NM_002024	FMR1	5	RNA binding|mRNA binding|protein binding|mRNA transport|transport|cytoplasm|nucleolus|nucleoplasm|nucleus|polysomal ribosome|soluble fraction
NM_002086	GRB2	5	SH3/SH2 adaptor activity|epidermal growth factor receptor binding|insulin receptor substrate binding|phosphoprotein binding|phosphotyrosine binding|protein binding|protein domain specific binding|MAPKKK cascade|Ras protein signal transduction|Ras protein signal transduction|aging|cell differentiation|cell-cell signaling|epidermal growth factor receptor signaling pathway|insulin receptor signaling…
NM_002293	LAMC1	5	extracellular matrix structural constituent|protein binding|cell adhesion|cell migration|endoderm development|extracellular matrix disassembly|hemidesmosome assembly|positive regulation of epithelial cell proliferation|protein complex assembly|substrate adhesion-dependent cell spreading|basal lamina|basement membrane|cytoplasm|extracellular matrix|extracellular region|extracellular space|laminin-…
NM_002298	LCP1	5	actin binding|actin filament binding|calcium ion binding|identical protein binding|protein binding|T cell activation during immune response|actin filament bundle assembly|regulation of intracellular protein transport|actin filament|cell junction|cytoplasm|cytoskeleton|cytosol|phagocytic cup|plasma membrane|ruffle membrane
NM_002401	MAP3K3	5	ATP binding|MAP kinase kinase kinase activity|metal ion binding|nucleotide binding|protein binding|protein kinase activity|protein serine/threonine kinase activity|transferase activity|MAPKKK cascade|positive regulation of I-kappaB kinase/NF-kappaB cascade|protein amino acid autophosphorylation|protein kinase cascade
NM_002522	NPTX1	5	metal ion binding|central nervous system development|synaptic transmission|transport|cytoplasmic vesicle|transport vesicle
NM_002523	NPTX2	5	metal ion binding|molecular_function|sugar binding|synaptic transmission|cellular_component|extracellular region
NM_002576	PAK1	5	ATP binding|collagen binding|nucleotide binding|protein binding|protein binding|protein kinase activity|protein serine/threonine kinase activity|transferase activity|ER-nuclear signaling pathway|MAPKKK cascade|apoptosis|cytoskeleton organization|positive regulation of JUN kinase activity|protein amino acid autophosphorylation|protein amino acid phosphorylation|Golgi apparatus|cell junction|cytopl…
NM_002581	PAPPA	5	metal ion binding|metallopeptidase activity|metallopeptidase activity|peptidase activity|zinc ion binding|cell differentiation|female pregnancy|extracellular region|extracellular region|membrane
NM_002590	PCDH8	5	calcium ion binding|protein binding|cell adhesion|cell-cell signaling|homophilic cell adhesion|morphogenesis of embryonic epithelium|somitogenesis|integral to plasma membrane|plasma membrane
NM_002731	PRKACB	5	ATP binding|cAMP-dependent protein kinase activity|magnesium ion binding|nucleotide binding|protein serine/threonine kinase activity|transferase activity|G-protein signaling, coupled to cAMP nucleotide second messenger|activation of protein kinase A activity|hormone-mediated signaling pathway|protein amino acid phosphorylation|protein kinase cascade|signal transduction|cAMP-dependent protein kina…
NM_002752	MAPK9	5	ATP binding|JUN kinase activity|MAP kinase activity|nucleotide binding|protein binding|protein serine/threonine kinase activity|transferase activity|JNK cascade|induction of apoptosis in response to chemical stimulus|positive regulation of gene expression|positive regulation of macrophage derived foam cell differentiation|protein amino acid phosphorylation|response to cadmium ion|response to stre…
NM_002906	RDX	5	actin binding|protein binding|actin filament capping|apical protein localization|microvillus assembly|apical part of cell|cytoplasm|cytoskeleton|extrinsic to membrane|filopodium|lamellipodium|plasma membrane|ruffle|stereocilium
NM_003029	SHC1	5	epidermal growth factor receptor binding|insulin receptor binding|insulin-like growth factor receptor binding|phospholipid binding|protein binding|transmembrane receptor protein tyrosine kinase adaptor protein activity|MAPKKK cascade|Ras protein signal transduction|activation of MAPK activity|epidermal growth factor receptor signaling pathway|insulin receptor signaling pathway|intracellular signa…
NM_003055	SLC18A3	5	acetylcholine transmembrane transporter activity|acetylcholine transport|transmembrane transport|clathrin sculpted acetylcholine transport vesicle membrane|integral to plasma membrane|membrane|membrane fraction
NM_003262	SEC62	5	protein transporter activity|receptor activity|cotranslational protein targeting to membrane|protein transport|transmembrane transport|cytoskeleton|endoplasmic reticulum|endoplasmic reticulum membrane|integral to membrane|membrane|rough endoplasmic reticulum
NM_003893	LDB1	5	DNA binding|LIM domain binding|LIM domain binding|protein binding|protein homodimerization activity|transcription corepressor activity|transcription regulator activity|transcription repressor activity|Wnt receptor signaling pathway|anterior/posterior axis specification|cerebellar Purkinje cell differentiation|cerebellum development|gastrulation with mouth forming second|multicellular organismal d…
NM_004171	SLC1A2	5	L-glutamate transmembrane transporter activity|glutamate:sodium symporter activity|high-affinity glutamate transmembrane transporter activity|sodium:dicarboxylate symporter activity|symporter activity|D-aspartate import|L-glutamate import|adult behavior|cellular response to extracellular stimulus|dicarboxylic acid transport|multicellular organism growth|multicellular organismal aging|nervous syst…
NM_004229	MED14	5	RNA polymerase II transcription mediator activity|ligand-dependent nuclear receptor transcription coactivator activity|protein binding|receptor activity|thyroid hormone receptor binding|transcription activator activity|transcription coactivator activity|transcription cofactor activity|vitamin D receptor binding|androgen receptor signaling pathway|positive regulation of transcription from RNA poly…
NM_004379	CREB1	5	RNA polymerase II transcription factor activity, enhancer binding|double-stranded DNA binding|protein binding|protein dimerization activity|sequence-specific DNA binding|specific RNA polymerase II transcription factor activity|transcription cofactor activity|transcription factor activity|axonogenesis|interspecies interaction between organisms|lactation|pituitary gland development|positive regulat…
NM_004441	EPHB1	5	ATP binding|axon guidance receptor activity|ephrin receptor activity|nucleotide binding|protein binding|receptor activity|transferase activity|transmembrane receptor protein tyrosine kinase activity|camera-type eye morphogenesis|cell-cell signaling|central nervous system projection neuron axonogenesis|cranial nerve development|nervous system development|optic nerve morphogenesis|protein amino aci…
NM_004561	OVOL1	5	DNA binding|metal ion binding|zinc ion binding|epidermis development|mesoderm development|negative regulation of transcription from RNA polymerase II promoter|pachytene|regulation of transcription|spermatogenesis|intracellular|nucleus
NM_004992	MECP2	5	DNA binding|double-stranded methylated DNA binding|protein N-terminus binding|protein binding|protein domain specific binding|transcription corepressor activity|transcription repressor activity|negative regulation of transcription|negative regulation of transcription from RNA polymerase II promoter|heterochromatin|nucleus
NM_005203	COL13A1	5	Data not found
NM_005207	CRKL	5	SH3/SH2 adaptor activity|protein binding|protein tyrosine kinase activity|signal transducer activity|JNK cascade|Ras protein signal transduction|anterior/posterior pattern formation|blood vessel development|heart development|intracellular signaling cascade|organ morphogenesis|parathyroid gland development|pattern specification process|thymus development
NM_005539	INPP5A	5	PH domain binding|hydrolase activity|inositol or phosphatidylinositol phosphatase activity|inositol-polyphosphate 5-phosphatase activity|cell communication|membrane
NM_005599	NHLH2	5	DNA binding|transcription regulator activity|cell differentiation|central nervous system development|mating behavior|multicellular organismal development|ovulation cycle|regulation of transcription|nucleus
NM_005746	NAMPT	5	cytokine activity|nicotinamide phosphoribosyltransferase activity|transferase activity, transferring glycosyl groups|NAD metabolic process|adipose tissue development|cell-cell signaling|insulin receptor signaling pathway|nicotinamide metabolic process|positive regulation of cell proliferation|positive regulation of nitric-oxide synthase biosynthetic process|pyridine nucleotide biosynthetic proces…
NM_005802	TOPORS	5	DNA binding|DNA topoisomerase I binding|antigen binding|ligase activity|metal ion binding|protein binding|zinc ion binding|apoptosis|maintenance of protein location in nucleus|positive regulation of transcription|regulation of cell proliferation|response to DNA damage stimulus|response to stimulus|transcription|visual perception|nuclear speck|nucleus
NM_005904	SMAD7	5	I-SMAD binding|activin binding|beta-catenin binding|collagen binding|promoter binding|protein binding|transcription factor activity|transforming growth factor beta receptor, inhibitory cytoplasmic mediator activity|type I transforming growth factor beta receptor binding|ubiquitin protein ligase binding|BMP signaling pathway|adherens junction assembly|artery morphogenesis|cellular protein complex …
NM_005938	FOXO4	5	DNA binding|enzyme binding|protein binding|sequence-specific DNA binding|transcription factor activity|transcription factor binding|G1 phase of mitotic cell cycle|cell cycle|cell cycle arrest|cell differentiation|insulin receptor signaling pathway|multicellular organismal development|muscle organ development|negative regulation of angiogenesis|negative regulation of cell proliferation|negative re…
NM_005984	SLC25A1	5	citrate transmembrane transporter activity|protein binding|transporter activity|mitochondrial citrate transport|transmembrane transport|integral to membrane|membrane|mitochondrial inner membrane|mitochondrion
NM_006141	DYNC1LI2	5	ATP binding|motor activity|nucleotide binding|cytoplasmic dynein complex|microtubule
NM_006439	MAB21L2	5	camera-type eye development|embryonic body morphogenesis|multicellular organismal development|nervous system development|positive regulation of cell proliferation|nucleus
NM_006496	GNAI3	5	GTP binding|GTPase activity|guanyl nucleotide binding|metabotropic serotonin receptor binding|nucleotide binding|protein binding|signal transducer activity|G-protein coupled receptor protein signaling pathway|negative regulation of adenylate cyclase activity|negative regulation of synaptic transmission|signal transduction|transport|vesicle fusion|Golgi apparatus|cytoplasm|membrane fraction|membra…
NM_006628	ARPP-19	5	potassium channel regulator activity|receptor binding|positive regulation of gluconeogenesis|positive regulation of glucose import|cytoplasm
NM_006675	TSPAN9	5	integral to plasma membrane|membrane|membrane fraction
NM_006908	RAC1	5	GTP binding|GTP-dependent protein binding|GTPase activity|enzyme binding|nucleotide binding|protein binding|actin filament polymerization|anatomical structure morphogenesis|apoptosis|cell adhesion|cellular component movement|induction of apoptosis by extracellular signals|inflammatory response|intracellular signaling cascade|lamellipodium assembly|localization within membrane|negative regulation …
NM_006948	HSPA13	5	ATP binding|nucleotide binding|endoplasmic reticulum|microsome
NM_006981	NR4A3	5	DNA binding|binding|metal ion binding|sequence-specific DNA binding|steroid hormone receptor activity|thyroid hormone receptor activity|transcription activator activity|transcription factor activity|zinc ion binding|adult behavior|biological_process|mesoderm formation|neuromuscular process controlling balance|organ regeneration|positive regulation of transcription from RNA polymerase II promoter|…
NM_007129	ZIC2	5	DNA binding|metal ion binding|protein binding|zinc ion binding|brain development|cell differentiation|developmental pigmentation|multicellular organismal development|neural tube closure|intracellular|nucleus
NM_007246	KLHL2	5	actin binding|protein binding|transporter activity|intracellular protein transport|actin cytoskeleton|cytoplasm|cytoskeleton
NM_012137	DDAH1	5	amino acid binding|catalytic activity|dimethylargininase activity|hydrolase activity|metal ion binding|arginine catabolic process|nitric oxide mediated signal transduction|positive regulation of angiogenesis|positive regulation of nitric oxide biosynthetic process|cytoplasm
NM_012199	EIF2C1	5	RNA binding|protein binding|gene silencing by RNA|negative regulation of translation involved in gene silencing by miRNA|nuclear-transcribed mRNA catabolic process|regulation of transcription|regulation of translation|cytoplasm|cytoplasmic mRNA processing body
NM_012244	SLC7A8	5	L-amino acid transmembrane transporter activity|amino acid transmembrane transporter activity|amino acid transmembrane transporter activity|neutral amino acid transmembrane transporter activity|organic cation transmembrane transporter activity|peptide antigen binding|protein binding|toxin transporter activity|L-amino acid transport|amino acid transport|amino acid transport|cellular amino acid met…
NM_012464	TLL1	5	calcium ion binding|metalloendopeptidase activity|peptidase activity|zinc ion binding|cell differentiation|multicellular organismal development|proteolysis|skeletal system development|extracellular region
NM_013272	SLCO3A1	5	transporter activity|ion transport|integral to membrane|membrane
NM_013995	LAMP2	5	endosome membrane|integral to membrane|late endosome|lysosomal membrane|lysosome|membrane fraction|plasma membrane|platelet dense granule membrane|platelet dense granule membrane
NM_014292	CBX6	5	chromatin binding|chromatin assembly or disassembly|chromatin modification|regulation of transcription|chromatin|nucleus
NM_014325	CORO1C	5	actin binding|phagocytosis|signal transduction|actin cytoskeleton
NM_014564	LHX3	5	RNA polymerase II transcription factor activity|metal ion binding|sequence-specific DNA binding|transcription factor activity|zinc ion binding|inner ear development|organ morphogenesis|regulation of transcription, DNA-dependent|nucleus
NM_014613	UBXD8	5	protein binding|response to unfolded protein|cytoplasm|endoplasmic reticulum|lipid particle
NM_014742	TM9SF4	5	integral to membrane|membrane
NM_014762	DHCR24	5	FAD binding|delta24-sterol reductase activity|enzyme binding|oxidoreductase activity|oxidoreductase activity, acting on the CH-CH group of donors, NAD or NADP as acceptor|peptide antigen binding|Ras protein signal transduction|amyloid precursor protein catabolic process|anti-apoptosis|apoptosis|cell cycle arrest|cellular membrane organization|cholesterol biosynthetic process|cholesterol biosynthe…
NM_014764	DAZAP2	5	WW domain binding|protein binding
NM_014776	GIT2	5	ARF GTPase activator activity|metal ion binding|protein binding|zinc ion binding|regulation of ARF GTPase activity|regulation of G-protein coupled receptor protein signaling pathway|nucleoplasm
NM_015157	PHLDB1	5
NM_015313	ARHGEF12	5	G-protein-coupled receptor binding|GTPase activator activity|Rho guanyl-nucleotide exchange factor activity|guanyl-nucleotide exchange factor activity|protein binding|G-protein coupled receptor protein signaling pathway|apoptosis|induction of apoptosis by extracellular signals|intracellular signaling cascade|regulation of Rho protein signal transduction|cytoplasm|cytosol|intracellular|membrane
NM_016235	GPRC5B	5
NM_016475	C14orf100	5	response to unfolded protein|endoplasmic reticulum|endoplasmic reticulum membrane|integral to membrane|membrane
NM_016531	KLF3	5	metal ion binding|transcription factor activity|zinc ion binding|multicellular organismal development|regulation of transcription|intracellular|nucleus
NM_016605	FAM53C	5
NM_016929	CLIC5	5	protein binding|voltage-gated chloride channel activity|voltage-gated ion channel activity|auditory receptor cell stereocilium organization|chloride transport|female pregnancy|ion transport|neuromuscular process controlling balance|protein localization|sensory perception of sound|transport|Golgi apparatus|actin cytoskeleton|cell cortex|chloride channel complex|cytoplasm|insoluble fraction|integra…
NM_017412	FZD3	5	G-protein coupled receptor activity|Wnt receptor activity|Wnt-protein binding|non-G-protein coupled 7TM receptor activity|G-protein coupled receptor protein signaling pathway|Wnt receptor signaling pathway|cell proliferation|establishment of planar polarity|inner ear morphogenesis|multicellular organismal development|neural tube closure|signal transduction|apical part of cell|integral to plasma m…
NM_017607	PPP1R12C	5	cytoplasm
NM_017637	BNC2	5	DNA binding|metal ion binding|zinc ion binding|regulation of transcription|cytoplasm|intracellular|nucleus|plasma membrane
NM_017849	TMEM127	5	molecular_function|biological_process|cellular_component|integral to membrane|membrane
NM_152682	RWDD4A	5
NM_152793	C7orf41	5
NM_153347	TMEM86A	5	integral to membrane|membrane
NM_153812	PHF13	5	metal ion binding|protein binding|zinc ion binding
NM_173475	DCUN1D3	5	molecular_function|negative regulation of S phase of mitotic cell cycle|negative regulation of cell growth|positive regulation of apoptosis|response to UV-C|response to gamma radiation|perinuclear region of cytoplasm
NM_173557	RNF152	5	metal ion binding|protein binding|zinc ion binding
NM_174965	ST3GAL3	5	N-acetyllactosaminide alpha-2,3-sialyltransferase activity|protein amino acid glycosylation|Golgi apparatus|Golgi cisterna membrane|extracellular region|integral to Golgi membrane|integral to membrane|membrane
NM_175061	JAZF1	5	metal ion binding|nucleic acid binding|transcription corepressor activity|zinc ion binding|negative regulation of transcription from RNA polymerase II promoter|regulation of transcription|intracellular|nucleus|transcriptional repressor complex
NM_175854	PAN3	5	ATP binding|protein kinase activity|nuclear-transcribed mRNA catabolic process, nonsense-mediated decay|protein amino acid phosphorylation|cytoplasm
NM_182797	PLCB4	5	calcium ion binding|hydrolase activity|phosphoinositide phospholipase C activity|phospholipase C activity|protein binding|signal transducer activity|intracellular signaling cascade|lipid catabolic process|cytosol
NM_182926	KTN1	5	molecular_function|microtubule-based movement|endoplasmic reticulum|endoplasmic reticulum membrane|integral to membrane|integral to plasma membrane|membrane|membrane fraction
NM_182970	RIMS4	5	exocytosis|neurotransmitter transport|cell junction|synapse
